# Supplementary material
Source: MDPI journal article supplement (https://www.mdpi.com/2073-4344/9/11/906)

---

**TEM**

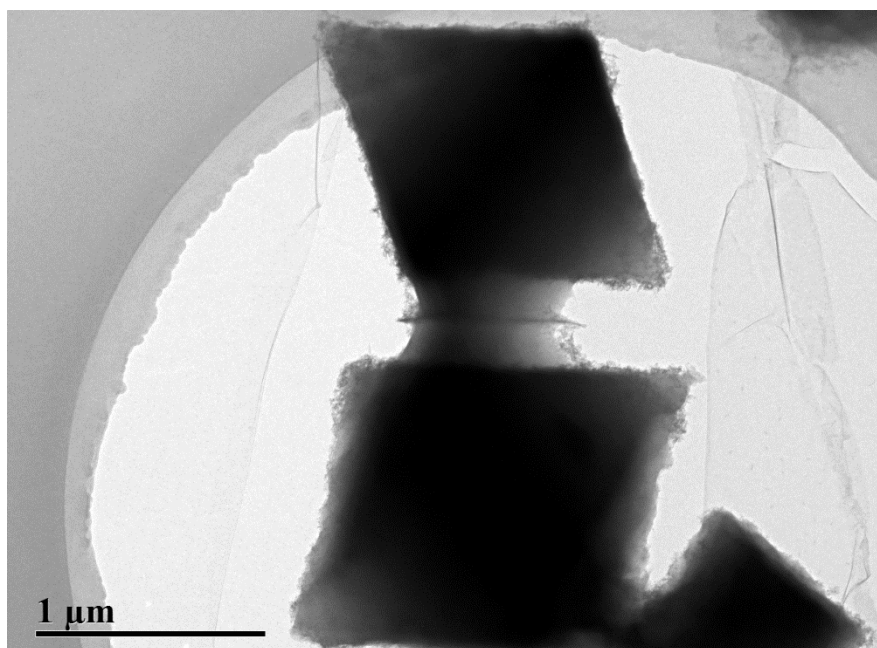

**Figure S1** TEM image of M-0

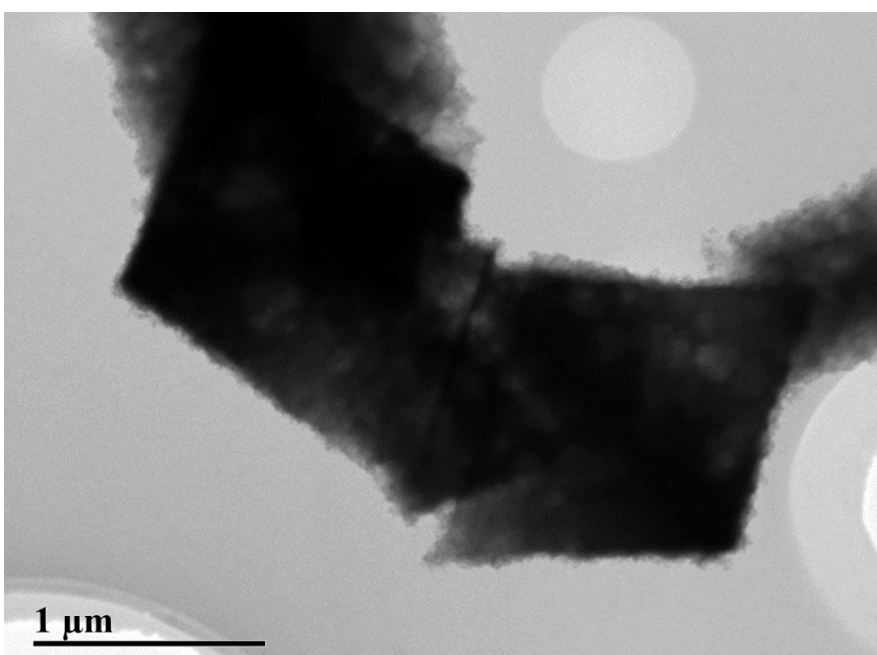

**Figure S2** TEM image of M-120

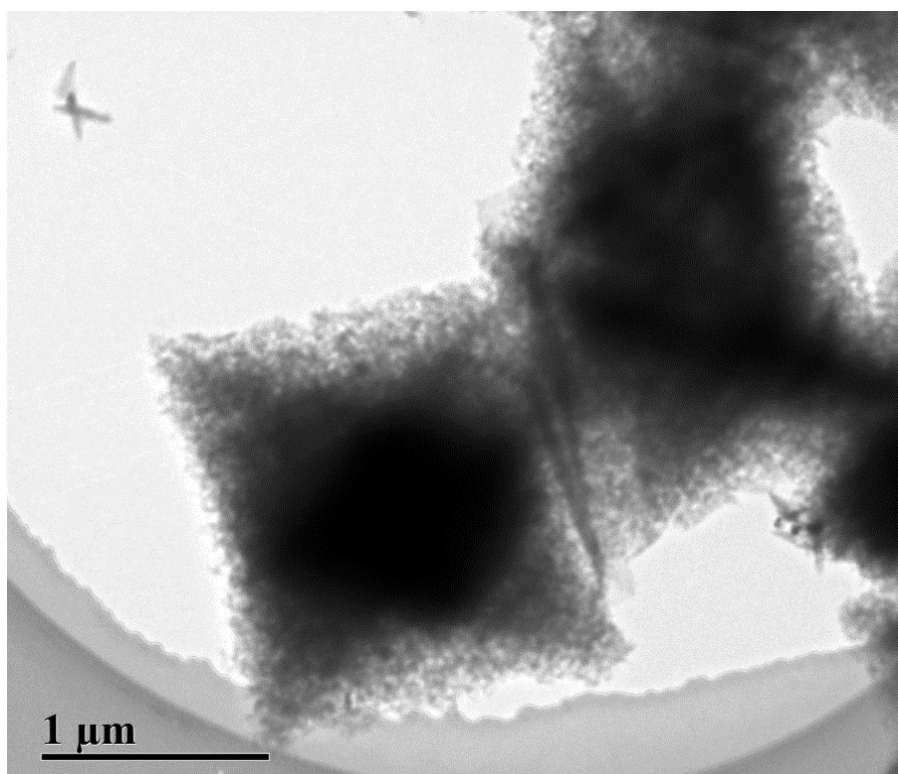

**Figure S3** TEM image of M-170

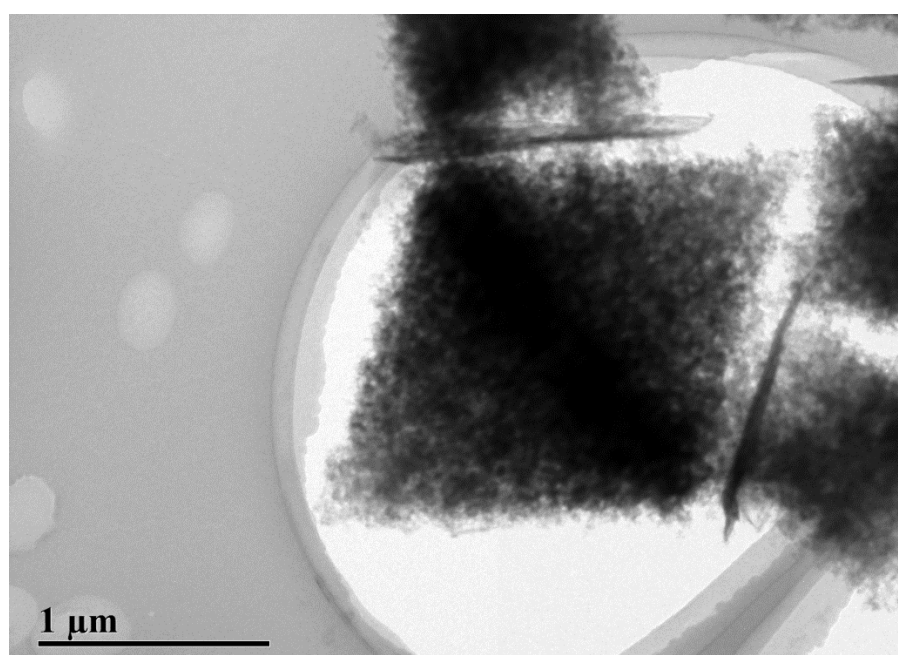

**Figure S4** TEM image of M-200

Supplement: s1 [file s1]
